# Supplementary material
Source: PubMed Central journal article supplement (PMC5788032)
Supplement: NIHMS932851-supplement-Supplemental_Material.pdf [file NIHMS932851-supplement-Supplemental_Material.pdf]

## SUPPLEMENTAL MATERIAL

### Expanded Methods

#### 1. Summative measure of medical conditions and health-risk behaviors

The medical conditions ascertained from medical records included Alzheimer's disease or dementia, coronary artery disease or myocardial infarction, atrial fibrillation, heart failure, cancer, chronic obstructive pulmonary disease, diabetes, end-stage renal disease, epilepsy, high cholesterol, hypertension, Parkinson's disease.

#### 2. Multiple imputation

PROC MI was used to create imputed data sets. The FCS statement was used for fully conditional specification methods, because the missing data pattern was arbitrary and imputed variables include both categorical and continuous variables. More specifically, the logistic regression method was used for binary or ordinal variables (education, stroke type, the categorized Modified Rankin Scale (MRS), pre-stroke depression, current smoking, obesity). The predictive mean matching method was used for continuous variables (scores of the National Institutes of Health Stroke Scale (NIHSS), and scores of the Informant Questionnaire on Cognitive Decline in the Elderly (IQCODE)). The number of imputations was set to ten, and the number of burn-in iterations before each imputation was set to 100. Variables used for multiple imputation models included age, sex, race-ethnicity, education, marital status, insurance status, stroke type and stroke severity, medical conditions, health-risk behaviors, functional limitation, cognitive function and pre-stroke depression. PROC MIANALYZE was used to combine the results of the imputation-based analyses and make statistical inferences.

#### 3. Inverse probability weighting

To determine predictors for generating the inverse probability weights, we fitted three prediction models using complete case analysis. Characteristics of the three samples are presented in Supplemental Tables S1-S3. Functional forms of continuous variables were determined using the LOWESS (locally weighted scatterplot smoothing) smoothed logit. Linear and squared terms of the same variable were grouped together in the backward-selection search (i.e. appeared or not appeared together). Predictors for

each model were selected based on backward stepwise logistic regression with a significance level of 0.20 for removal from the model (Supplemental Table S4).

In the first prediction model (Prediction Model 1), the probability of participating in the interview portion of the BASIC study among patients who survived 90 days after stroke was modeled as a function of race-ethnicity, insurance status, stroke severity (log-transformed NIHSS score and log-transformed NIHSS score squared) and history of congestive heart failure.

In the second prediction model (Prediction Model 2), the probability of having a non-proxy baseline interview (versus proxy interview) among participants who completed the baseline interview was modeled as a function of age, insurance status, stroke severity (log-transformed NIHSS score and log-transformed NIHSS score squared), stroke type, baseline functional limitations (MRS scores), pre-stroke cognitive function (IQCODE scores), medical conditions (Alzheimer's disease or dementia, congestive heart failure, atrial fibrillation and cancer) and excessive alcohol use.

In the third prediction model (Prediction Model 3), the probability of completing the outcome interview at 90 days among participants with non-proxy baseline interview was modeled as a function of age, sex, education, stroke severity (log-transformed NIHSS scores and log-transformed NIHSS score squared), and pre-stroke functional limitation.

Supplemental Table S1. Sample Characteristics of the Prediction Model 1

|                                     | Total<br>(n=1360) | Patients who participated in<br>the baseline interview<br>(n=1034) | Patients who did not<br>participate in the baseline<br>interview (n=326) | <i>P</i> value |
|-------------------------------------|-------------------|--------------------------------------------------------------------|--------------------------------------------------------------------------|----------------|
| Age, mean (SD)                      | 67.8 (12.3)       | 67.6 (12.1)                                                        | 68.4 (12.9)                                                              | 0.367          |
| Sex, N (%)                          |                   |                                                                    |                                                                          | 0.709          |
| Male                                | 722 (53.1)        | 546 (52.8)                                                         | 176 (54.0)                                                               |                |
| Female                              | 638 (46.9)        | 488 (47.2)                                                         | 150 (46.0)                                                               |                |
| Ethnicity, N (%)                    |                   |                                                                    |                                                                          | 0.008          |
| Non-Hispanic Whites                 | 545 (40.1)        | 394 (38.1)                                                         | 151 (46.3)                                                               |                |
| Mexican Americans                   | 815 (59.9)        | 640 (61.9)                                                         | 175 (53.7)                                                               |                |
| Insurance status, N (%)             |                   |                                                                    |                                                                          | 0.210          |
| Uninsured                           | 165 (12.1)        | 119 (11.5)                                                         | 46 (14.1)                                                                |                |
| Insured                             | 1195 (87.9)       | 915 (88.5)                                                         | 280 (85.9)                                                               |                |
| Stroke type*, N (%)                 |                   |                                                                    |                                                                          | 0.271          |
| Ischemic stroke                     | 1190 (87.8)       | 900 (87.2)                                                         | 290 (89.5)                                                               |                |
| Intracerebral hemorrhage stroke     | 166 (12.2)        | 132 (12.8)                                                         | 34 (10.5)                                                                |                |
| Stroke severity (NIHSS)*, mean (SD) | 5.5 (6.5)         | 5.6 (6.5)                                                          | 5.1 (6.5)                                                                | <0.01          |
| Medical conditions, N (column %)    |                   |                                                                    |                                                                          |                |
| Dementia/Alzheimer's disease        | 85 (6.3)          | 67 (6.5)                                                           | 18 (5.5)                                                                 | 0.533          |
| Atrial fibrillation                 | 163 (12.0)        | 121 (11.7)                                                         | 42 (12.9)                                                                | 0.567          |
| Congestive heart failure            | 95 (7.0)          | 64 (6.2)                                                           | 31 (9.5)                                                                 | 0.040          |
| Coronary artery disease             | 334 (24.6)        | 255 (24.7)                                                         | 79 (24.2)                                                                | 0.875          |
| Hypertension                        | 1056 (77.7)       | 808 (78.1)                                                         | 248 (76.1)                                                               | 0.434          |
| Diabetes                            | 609 (44.8)        | 464 (44.9)                                                         | 145 (44.5)                                                               | 0.900          |
| Cancer                              | 156 (11.5)        | 120 (11.6)                                                         | 36 (11.0)                                                                | 0.781          |
| COPD                                | 116 (8.5)         | 84 (8.1)                                                           | 32 (9.8)                                                                 | 0.340          |
| Health-risk behaviors, N (column %) |                   |                                                                    |                                                                          |                |
| Current smoking*                    | 316 (24.1)        | 236 (23.7)                                                         | 80 (25.2)                                                                | 0.588          |
| Excessive alcohol use               | 127 (9.3)         | 95 (9.2)                                                           | 32 (9.8)                                                                 | 0.734          |
| Obesity*, N (column %)              | 513 (37.8)        | 397 (38.5)                                                         | 116 (35.7)                                                               | 0.362          |

Abbreviations: COPD, chronic obstructive pulmonary disease; NIHSS, the National Institutes of Health Stroke Scale; SD, standard deviation.

\*Variables with missing data. The numbers of missing values are 4 for stroke type, 5 for NIHSS, 49 for current smoking, and 4 for obesity.

Supplemental Table S2. Sample Characteristics of the Prediction Model 2

|                                         | Total<br>(n=1034) | Patients who had non-proxy<br>baseline interview<br>(n=801) | Patients who had proxy<br>baseline interview<br>(n=233) | <i>P</i> value |
|-----------------------------------------|-------------------|-------------------------------------------------------------|---------------------------------------------------------|----------------|
| Age, mean (SD)                          | 67.6 (12.1)       | 65.7 (11.2)                                                 | 74.1 (12.7)                                             | <0.001         |
| Sex, N (%)                              |                   |                                                             |                                                         | 0.052          |
| Male                                    | 546 (52.8)        | 436 (54.4)                                                  | 110 (47.2)                                              |                |
| Female                                  | 488 (47.2)        | 365 (45.6)                                                  | 123 (52.8)                                              |                |
| Ethnicity, N (%)                        |                   |                                                             |                                                         | 0.035          |
| Non-Hispanic Whites                     | 394 (38.1)        | 319 (39.8)                                                  | 75 (32.2)                                               |                |
| Mexican Americans                       | 640 (61.9)        | 482 (60.2)                                                  | 158 (67.8)                                              |                |
| Education*, N (%)                       |                   |                                                             |                                                         | <0.001         |
| Below high school                       | 346 (33.6)        | 243 (30.3)                                                  | 103 (45.0)                                              |                |
| High school                             | 288 (28.0)        | 235 (29.3)                                                  | 53 (23.1)                                               |                |
| Vocational/some college                 | 256 (24.9)        | 215 (26.8)                                                  | 41 (17.9)                                               |                |
| College or more                         | 140 (13.6)        | 108 (13.5)                                                  | 32 (14.0)                                               |                |
| Marital status, N (%)                   |                   |                                                             |                                                         | 0.811          |
| Married or living together              | 512 (49.6)        | 399 (49.8)                                                  | 113 (48.9)                                              |                |
| Single/widowed/divorced /Separated      | 520 (50.4)        | 402 (50.2)                                                  | 118 (51.1)                                              |                |
| Insurance status, N (%)                 |                   |                                                             |                                                         | <0.001         |
| Uninsured                               | 119 (11.5)        | 108 (13.5)                                                  | 11 (4.7)                                                |                |
| Insured                                 | 915 (88.5)        | 693 (86.5)                                                  | 222 (95.3)                                              |                |
| Stroke type*, N (%)                     |                   |                                                             |                                                         | <0.001         |
| Ischemic stroke                         | 900 (87.2)        | 727 (91.0)                                                  | 173 (74.3)                                              |                |
| Intracerebral hemorrhage stroke         | 132 (12.8)        | 72 (9.0)                                                    | 60 (25.7)                                               |                |
| Stroke severity (NIHSS)*, mean (SD)     | 5.6 (6.5)         | 4.2 (4.9)                                                   | 10.5 (8.7)                                              | <0.001         |
| Cognitive function (IQCODE)*, mean (SD) | 3.2 (0.4)         | 3.1 (0.3)                                                   | 3.3 (0.5)                                               | <0.001         |
| Modified Rankin Scale*, N (%)           |                   |                                                             |                                                         | <0.001         |
| 0-1                                     | 472 (46.4)        | 408 (51.7)                                                  | 64 (28.2)                                               |                |
| 2-3                                     | 460 (45.2)        | 346 (43.8)                                                  | 114 (50.2)                                              |                |
| 4-5                                     | 85 (8.4)          | 36 (4.5)                                                    | 49 (21.6)                                               |                |
| Medical conditions, N (column %)        |                   |                                                             |                                                         |                |
| Dementia/Alzheimer's disease            | 67 (6.5)          | 23 (2.9)                                                    | 44 (18.9)                                               | <0.001         |
| Atrial fibrillation                     | 121 (11.7)        | 88 (11.0)                                                   | 33 (14.2)                                               | 0.184          |
| Congestive heart failure                | 64 (6.2)          | 41 (5.1)                                                    | 23 (9.8)                                                | 0.008          |
| Coronary artery disease                 | 255 (24.7)        | 188 (23.5)                                                  | 67 (28.8)                                               | 0.100          |

|                                     |            |            |            |       |
|-------------------------------------|------------|------------|------------|-------|
| Hypertension                        | 808 (78.1) | 615 (76.8) | 193 (82.8) | 0.049 |
| Diabetes                            | 464 (44.9) | 365 (45.6) | 99 (42.5)  | 0.406 |
| Cancer                              | 120 (11.6) | 98 (12.2)  | 22 (9.4)   | 0.241 |
| COPD                                | 84 (8.1)   | 65 (8.1)   | 19 (8.2)   | 0.984 |
| Health-risk behaviors, N (column %) |            |            |            |       |
| Current smoking*                    | 236 (23.7) | 197 (25.6) | 39 (17.5)  | 0.013 |
| Excessive alcohol use               | 95 (9.2)   | 73 (9.1)   | 22 (9.4)   | 0.879 |
| Obesity*, N (column %)              | 397 (38.5) | 320 (40.0) | 77 (33.3)  | 0.067 |

---

Abbreviations: COPD, chronic obstructive pulmonary disease; IQCODE, the Informant Questionnaire on Cognitive Decline in the Elderly; NIHSS, the National Institutes of Health Stroke Scale; SD, standard deviation.

\*Variables with missing data. The numbers of missing values are 4 for education, 2 for stroke type, 5 for NIHSS, 17 for Modified Rankin Scale, 136 for IQCODE, 40 for current smoking, and 3 for obesity.

Supplemental Table S3. Sample Characteristics of the Prediction Model 3

|                                           | Total<br>(n=801) | Patients who participate<br>in the outcome interview<br>(n=616) | Patients who did not participate<br>in the outcome interview<br>(n=185) | <i>P</i> value |
|-------------------------------------------|------------------|-----------------------------------------------------------------|-------------------------------------------------------------------------|----------------|
| Age, mean (SD)                            | 65.7 (11.2)      | 66.2 (11.3)                                                     | 63.9 (10.9)                                                             | 0.015          |
| Sex, N (%)                                |                  |                                                                 |                                                                         | 0.002          |
| Male                                      | 436 (54.4)       | 317 (51.5)                                                      | 119 (64.3)                                                              |                |
| Female                                    | 365 (45.6)       | 299 (48.5)                                                      | 66 (35.7)                                                               |                |
| Ethnicity, N (%)                          |                  |                                                                 |                                                                         | 0.908          |
| Non-Hispanic Whites                       | 319 (39.8)       | 246 (39.9)                                                      | 73 (39.5)                                                               |                |
| Mexican Americans                         | 482 (60.2)       | 370 (60.1)                                                      | 112 (60.5)                                                              |                |
| Education, N (%)                          |                  |                                                                 |                                                                         | 0.151          |
| Below high school                         | 243 (30.3)       | 179 (29.1)                                                      | 64 (34.6)                                                               |                |
| High school                               | 235 (29.3)       | 173 (28.1)                                                      | 62 (33.5)                                                               |                |
| Vocational/some college                   | 215 (26.8)       | 177 (28.7)                                                      | 38 (20.5)                                                               |                |
| College or more                           | 108 (13.5)       | 87 (14.1)                                                       | 21 (11.4)                                                               |                |
| Marital status, N (%)                     |                  |                                                                 |                                                                         | 0.388          |
| Married or living together                | 399 (49.8)       | 312 (50.7)                                                      | 87 (47.0)                                                               |                |
| Single/widowed/divorced or separated      | 402 (50.2)       | 304 (49.3)                                                      | 98 (53.0)                                                               |                |
| Insurance status, N (%)                   |                  |                                                                 |                                                                         | 0.048          |
| Uninsured                                 | 108 (13.5)       | 75 (12.2)                                                       | 33 (17.8)                                                               |                |
| Insured                                   | 693 (86.5)       | 541 (87.8)                                                      | 152 (82.2)                                                              |                |
| Stroke type*, N (%)                       |                  |                                                                 |                                                                         | 0.316          |
| Ischemic stroke                           | 727 (91.0)       | 563 (91.5)                                                      | 164 (89.1)                                                              |                |
| Intracerebral hemorrhage stroke           | 72 (9.0)         | 52 (8.5)                                                        | 20 (10.9)                                                               |                |
| Stroke severity (NIHSS)*, mean (SD)       | 4.2 (4.9)        | 4.1 (4.7)                                                       | 4.6 (5.6)                                                               | 0.517          |
| Cognitive function (IQCODE)*, mean (SD)   | 3.1 (0.3)        | 3.1 (0.3)                                                       | 3.1 (0.3)                                                               | 0.296          |
| Functional limitation (MRS)*, N (%)       |                  |                                                                 |                                                                         | 0.844          |
| No symptoms or disability (0-1)           | 408 (51.7)       | 314 (51.7)                                                      | 94 (51.4)                                                               |                |
| Slight/moderate disability (2-3)          | 346 (43.8)       | 264 (43.5)                                                      | 82 (44.8)                                                               |                |
| Moderately severe/severe disability (4-5) | 36 (4.5)         | 29 (4.8)                                                        | 7 (3.8)                                                                 |                |
| Medical conditions, N (%)                 |                  |                                                                 |                                                                         |                |
| Dementia/Alzheimer's disease              | 23 (2.9)         | 21 (3.4)                                                        | 2 (1.1)                                                                 | 0.096          |
| Atrial fibrillation                       | 88 (11.0)        | 69 (11.2)                                                       | 19 (10.3)                                                               | 0.723          |
| Congestive heart failure                  | 41 (5.1)         | 31 (5.0)                                                        | 10 (5.4)                                                                | 0.840          |
| Coronary artery disease                   | 188 (23.5)       | 153 (24.8)                                                      | 35 (18.9)                                                               | 0.096          |

|                               |            |            |            |       |
|-------------------------------|------------|------------|------------|-------|
| Hypertension                  | 615 (76.8) | 476 (77.3) | 139 (75.1) | 0.546 |
| Diabetes                      | 365 (45.6) | 275 (44.6) | 90 (48.7)  | 0.337 |
| Cancer                        | 98 (12.2)  | 76 (12.3)  | 22 (11.9)  | 0.871 |
| COPD                          |            |            |            | 0.355 |
| Health-risk behaviors, N (%)  |            |            |            |       |
| Current smoking*              | 197 (25.6) | 148 (25.1) | 49 (27.1)  | 0.592 |
| Excessive alcohol use         | 73 (9.1)   | 51 (8.3)   | 22 (11.9)  | 0.134 |
| Obesity*                      | 320 (40.0) | 252 (40.9) | 68 (37.0)  | 0.337 |
| Pre-stroke depression*, N (%) |            |            |            | 0.395 |
| None                          | 532 (67.3) | 403 (66.4) | 129 (70.5) |       |
| Past depression history       | 129 (16.3) | 99 (16.3)  | 30 (16.4)  |       |
| Current antidepressant use    | 129 (16.3) | 105 (17.3) | 24 (13.1)  |       |

---

Abbreviations: COPD, chronic obstructive pulmonary disease; IQCODE, the Informant Questionnaire on Cognitive Decline in the Elderly; MRS, modified Rankin scale; NIHSS, the National Institutes of Health Stroke Scale; SD, standard deviation.

\*Variables with missing data. The numbers of missing values are 2 for stroke type, 3 for NIHSS, 11 for Modified Rankin Scale, 133 for IQCODE, 30 for current smoking, 1 for obesity, and 11 for history of depression and antidepressant use.

Supplemental Table S4. Prediction Models Based on Backward Stepwise Logistic Regression

|                                           | Prediction Model 1<br>(n=1298) | Prediction Model 2<br>(n=842) | Prediction Model 3<br>(n=623) |
|-------------------------------------------|--------------------------------|-------------------------------|-------------------------------|
| Age                                       |                                | 0.95 (0.94, 0.97)             | 1.02 (1.00, 1.04)             |
| Sex                                       |                                |                               |                               |
| Male                                      |                                |                               | Reference                     |
| Female                                    |                                |                               | 1.89 (1.24, 2.87)             |
| Ethnicity                                 |                                |                               |                               |
| Non-Hispanic Whites                       | Reference                      |                               |                               |
| Mexican Americans                         | 1.43 (1.10, 1.85)              |                               |                               |
| Insurance status                          |                                |                               |                               |
| Insured                                   | Reference                      |                               |                               |
| Uninsured                                 | 0.75 (0.52, 1.10)              |                               |                               |
| Stroke type                               |                                |                               |                               |
| Ischemic stroke                           |                                | Reference                     |                               |
| Intracerebral hemorrhage stroke           |                                | 0.38 (0.23, 0.62)             |                               |
| Stroke severity (NIHSS)                   |                                |                               |                               |
| Log NIHSS                                 | 1.51 (1.01, 2.26)              | 1.55 (0.80, 2.98)             | 1.45 (0.76, 2.77)             |
| Log NIHSS squared                         | 0.91 (0.80, 1.04)              | 0.67 (0.55, 0.82)             | 0.81 (0.66, 1.01)             |
| Cognitive function (IQCODE)               |                                |                               |                               |
| Normal                                    |                                | Reference                     |                               |
| CIND                                      |                                | 1.15 (0.74, 1.78)             |                               |
| Dementia                                  |                                | 0.57 (0.32, 1.03)             |                               |
| Pre-stroke disability(MRS)                |                                |                               |                               |
| No symptoms or disability (0-1)           |                                | Reference                     |                               |
| Slight/moderate disability (2-3)          |                                | 0.62 (0.40, 0.94)             |                               |
| Moderately severe/severe disability (4-5) |                                | 0.27 (0.14, 0.54)             |                               |
| Medical conditions                        |                                |                               |                               |
| Dementia/Alzheimer's disease              |                                | 0.29 (0.14, 0.62)             |                               |
| Congestive heart failure                  | 0.51 (0.32, 0.82)              | 0.57 (0.27, 1.20)             |                               |
| Atrial fibrillation                       |                                | 1.80 (0.96, 3.40)             |                               |
| Cancer                                    |                                | 2.76 (1.39, 5.49)             |                               |
| Excessive alcohol use                     |                                | 0.61 (0.32, 1.14)             |                               |
| Obesity                                   |                                |                               | 1.33 (0.87, 2.04)             |

Abbreviations: CIND, cognitive impairment no dementia; IQCODE, the Informant Questionnaire on Cognitive Decline in the Elderly; MRS, modified Rankin scale; NIHSS, the National Institutes of Health Stroke Scale.



Supplemental Table S5. Results from the fully adjusted multivariable logistic regression of the association between ethnicity and prevalence of post-stroke depression adjusted for selected covariates, the Brain Attack Surveillance in Corpus Christi study, United States, 2011-2015.

|                                           | Adjusted for attrition (n=586)<br>OR (95% CI) |
|-------------------------------------------|-----------------------------------------------|
| Ethnicity                                 |                                               |
| Mexican Americans                         | 1.15 (0.68, 1.95)                             |
| Non-Hispanic Whites                       | Reference                                     |
| Age                                       | 0.97 (0.95, 0.99)                             |
| Sex                                       |                                               |
| Male                                      | Reference                                     |
| Female                                    | 0.99 (0.62, 1.59)                             |
| Education                                 |                                               |
| Below high school                         | 1.55 (0.84, 2.85)                             |
| High school                               | Reference                                     |
| Vocational/some college                   | 0.94 (0.52, 1.70)                             |
| College or more                           | 0.61 (0.26, 1.42)                             |
| Insurance status                          |                                               |
| Insured                                   | Reference                                     |
| Uninsured                                 | 1.24 (0.63, 2.44)                             |
| Marital status                            |                                               |
| Married or living together                | Reference                                     |
| Single/separated/divorced                 | 1.20 (0.76, 1.90)                             |
| Stroke type                               |                                               |
| Ischemic stroke                           | Reference                                     |
| Intracerebral hemorrhage stroke           | 0.97 (0.45, 2.10)                             |
| Stroke severity (log-transformed NIHSS)   | 1.16 (0.90, 1.50)                             |
| Pre-stroke disability (MRS)               |                                               |
| No symptoms or disability (0-1)           | Reference                                     |
| Slight/moderate disability (2-3)          | 1.39 (0.85, 2.27)                             |
| Moderately severe/severe disability (4-5) | 1.89 (0.72, 4.98)                             |
| Cognitive function (IQCODE)               |                                               |
| Normal (0-3)                              | Reference                                     |
| CIND (3.01-3.43)                          | 0.98 (0.56, 1.69)                             |
| Dementia ( $\geq 3.44$ )                  | 1.16 (0.53, 2.49)                             |
| Pre-stroke depression                     |                                               |
| None                                      | Reference                                     |
| Past depression history                   | 2.33 (1.29, 4.22)                             |
| Antidepressant use at stroke onset        | 4.94 (2.74, 8.92)                             |
| Number of medical conditions              | 1.15 (0.99, 1.33)                             |
| Current smoking                           |                                               |
| No                                        | Reference                                     |
| Yes                                       | 2.38 (1.43, 3.97)                             |
| Excessive alcohol use                     |                                               |
| No                                        | Reference                                     |
| Yes                                       | 0.96 (0.43, 2.13)                             |
| Obesity                                   |                                               |
| No                                        | Reference                                     |
| Yes                                       | 1.34 (0.84, 2.13)                             |
